# Supplementary material for: Protein Repeats from First Principles
Source: PubMed Central journal article supplement (PMC4820709; doi:10.1038/srep23959), 2016-04-05
Supplement: srep23959-s1.pdf [file srep23959-s1.pdf]

# Supplementary Information

## Protein Repeats from First Principles

Pablo Turjanski<sup>1</sup>, R. Gonzalo Parra<sup>2</sup>, Rocío Espada<sup>2</sup>, Verónica Becher<sup>1</sup> and Diego  
U. Ferreiro<sup>1,\*</sup>

<sup>1</sup>Departamento de Computación, Facultad de Ciencias Exactas y Naturales,  
Universidad de Buenos Aires, Buenos Aires, Argentina

<sup>2</sup>Protein Physiology Lab, Departamento de Química Biológica, Facultad de  
Ciencias Exactas y Naturales, Universidad de Buenos  
Aires-CONICET-IQUIBICEN, Buenos Aires, Argentina

\*corresponding author: ferreiro@qb.fcen.uba.ar

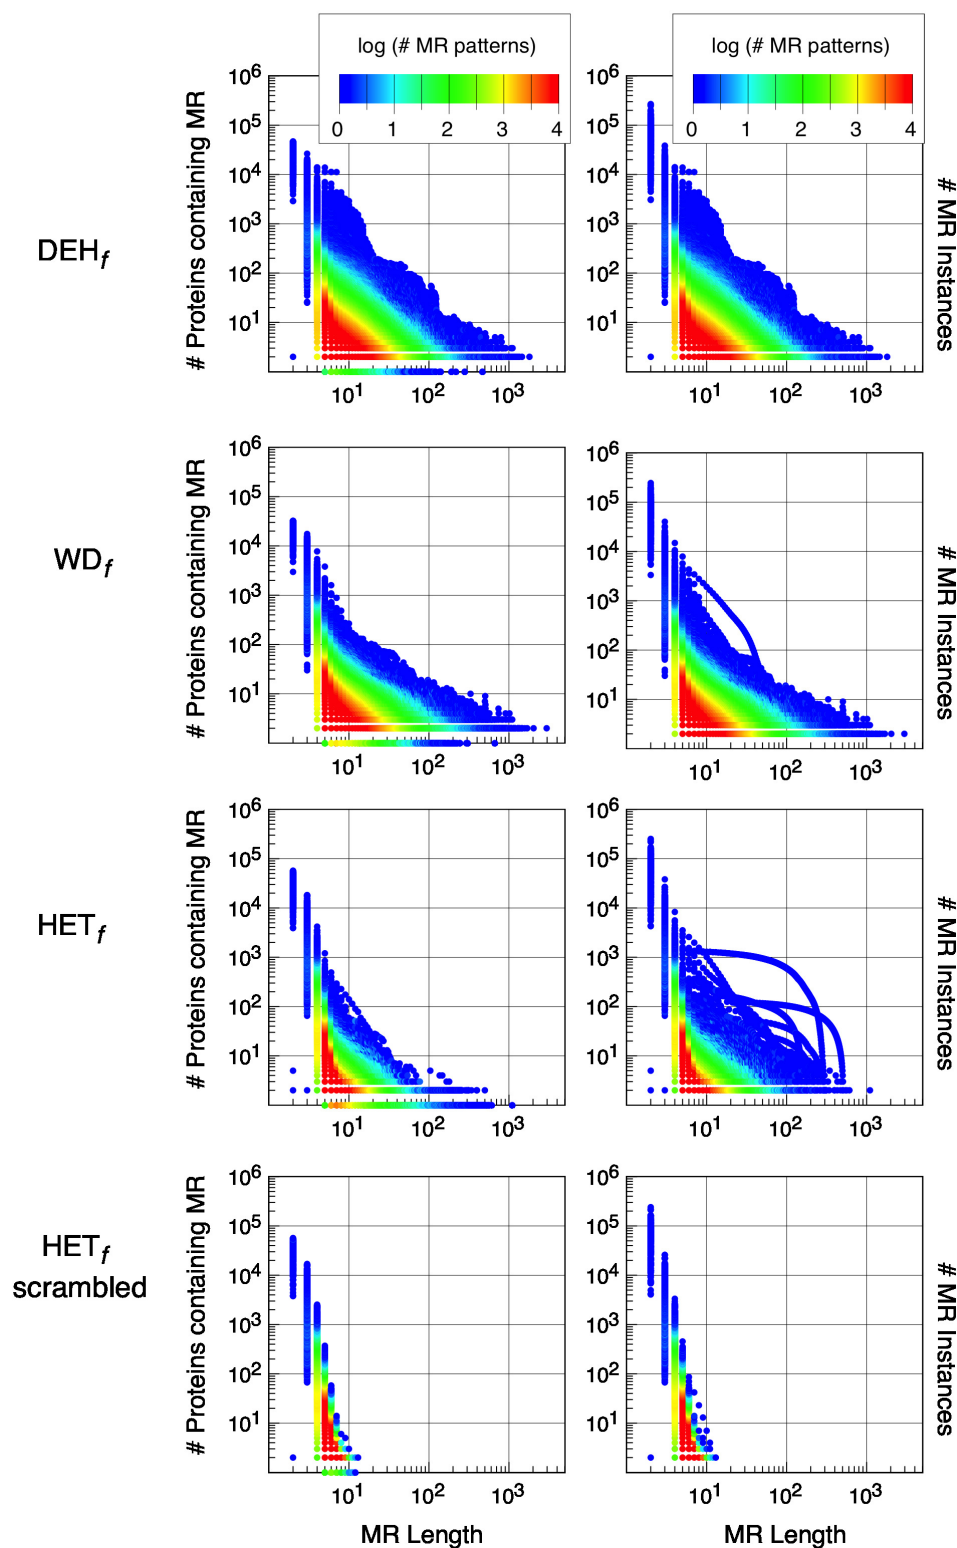

**Figure S1: Maximal repeats (MR) distribution within the proteins members of the family.** The sequences of distinct families were used to calculate the MR set. The distribution of the millions of MR found on the each set is shown according to the length of the pattern. On the left column, the number of different proteins that contain the MR pattern. On the right column, the number of time each MR pattern is present in the whole dataset. The colorscale denotes the number of different MR patterns that occur at a particular coordinate.

**Table S1: Coverage of trial sequences of the ANK<sub>t</sub> group.** The values for the  $coverage(s, \mathcal{M}(s, i))$  function for each sequence,  $s$ , name by the UniProt identifier was calculated for different minimum length of the maximal repeats (MR) from  $i = 0 \dots 10$ . Values rounded to two decimal places.

| Uniprot ID<br>( $s$ ) | $i = 0$ | $i = 1$ | $i = 2$ | $i = 3$ | $i = 4$ | $i = 5$ | $i = 6$ | $i = 7$ | $i = 8$ | $i = 9$ | $i = 10$ |
|-----------------------|---------|---------|---------|---------|---------|---------|---------|---------|---------|---------|----------|
| DARPIN-1D5            | 1.00    | 0.98    | 0.79    | 0.43    | 0.43    | 0.43    | 0.43    | 0.38    | 0.27    | 0.27    | 0.27     |
| DARPIN-20             | 1.00    | 0.99    | 0.77    | 0.40    | 0.40    | 0.40    | 0.32    | 0.27    | 0.16    | 0.16    | 0.16     |
| DARPIN-3ANK           | 1.00    | 0.99    | 0.99    | 0.99    | 0.99    | 0.99    | 0.99    | 0.99    | 0.99    | 0.99    | 0.99     |
| DARPIN-3CA1A2N        | 1.00    | 0.98    | 0.72    | 0.27    | 0.18    | 0.00    | 0.00    | 0.00    | 0.00    | 0.00    | 0.00     |
| DARPIN-3CA1A2N-OH     | 1.00    | 0.98    | 0.75    | 0.32    | 0.24    | 0.10    | 0.00    | 0.00    | 0.00    | 0.00    | 0.00     |
| DARPIN-3H10           | 1.00    | 0.99    | 0.81    | 0.68    | 0.60    | 0.57    | 0.57    | 0.52    | 0.36    | 0.36    | 0.36     |
| DARPIN-4ANK           | 1.00    | 0.99    | 0.99    | 0.99    | 0.99    | 0.99    | 0.99    | 0.99    | 0.99    | 0.99    | 0.99     |
| DARPIN-AR-3A          | 1.00    | 1.00    | 0.79    | 0.50    | 0.50    | 0.50    | 0.40    | 0.32    | 0.23    | 0.23    | 0.23     |
| DARPIN-AR-F8          | 1.00    | 0.99    | 0.80    | 0.56    | 0.51    | 0.51    | 0.51    | 0.43    | 0.30    | 0.30    | 0.30     |
| DARPIN-E3-19          | 1.00    | 0.99    | 0.83    | 0.58    | 0.55    | 0.55    | 0.55    | 0.55    | 0.42    | 0.42    | 0.30     |
| DARPIN-E3-5           | 1.00    | 0.99    | 0.86    | 0.60    | 0.57    | 0.52    | 0.52    | 0.52    | 0.30    | 0.30    | 0.30     |
| DARPIN-H10-2-G3       | 1.00    | 0.99    | 0.81    | 0.37    | 0.32    | 0.32    | 0.16    | 0.11    | 0.00    | 0.00    | 0.00     |
| DARPIN-NI1C-Mut4      | 1.00    | 0.96    | 0.73    | 0.21    | 0.09    | 0.00    | 0.00    | 0.00    | 0.00    | 0.00    | 0.00     |
| DARPIN-NI3C           | 1.00    | 0.99    | 0.89    | 0.70    | 0.68    | 0.68    | 0.68    | 0.68    | 0.68    | 0.68    | 0.68     |
| DARPIN-NI3C-Mut5      | 1.00    | 0.99    | 0.89    | 0.71    | 0.67    | 0.67    | 0.67    | 0.67    | 0.67    | 0.67    | 0.67     |
| DARPIN-OFF7           | 1.00    | 1.00    | 0.80    | 0.51    | 0.51    | 0.51    | 0.51    | 0.50    | 0.36    | 0.26    | 0.26     |
| E9ADW8                | 1.00    | 1.00    | 0.89    | 0.26    | 0.06    | 0.00    | 0.00    | 0.00    | 0.00    | 0.00    | 0.00     |
| NRC                   | 1.00    | 0.99    | 0.96    | 0.90    | 0.77    | 0.74    | 0.69    | 0.59    | 0.59    | 0.45    | 0.36     |
| O14593                | 1.00    | 1.00    | 0.83    | 0.26    | 0.00    | 0.00    | 0.00    | 0.00    | 0.00    | 0.00    | 0.00     |
| O22265                | 1.00    | 1.00    | 0.86    | 0.26    | 0.10    | 0.05    | 0.02    | 0.00    | 0.00    | 0.00    | 0.00     |
| O35433                | 1.00    | 1.00    | 0.97    | 0.37    | 0.04    | 0.00    | 0.00    | 0.00    | 0.00    | 0.00    | 0.00     |
| O75832                | 1.00    | 1.00    | 0.81    | 0.16    | 0.04    | 0.00    | 0.00    | 0.00    | 0.00    | 0.00    | 0.00     |
| OR264                 | 1.00    | 0.98    | 0.90    | 0.81    | 0.77    | 0.77    | 0.70    | 0.63    | 0.63    | 0.63    | 0.57     |
| OR266                 | 1.00    | 0.98    | 0.90    | 0.78    | 0.71    | 0.71    | 0.61    | 0.57    | 0.57    | 0.57    | 0.57     |
| P07207                | 1.00    | 1.00    | 1.00    | 0.81    | 0.37    | 0.19    | 0.14    | 0.08    | 0.03    | 0.01    | 0.01     |
| P09959                | 1.00    | 1.00    | 0.97    | 0.50    | 0.09    | 0.01    | 0.00    | 0.00    | 0.00    | 0.00    | 0.00     |
| P14585                | 1.00    | 1.00    | 1.00    | 0.58    | 0.11    | 0.03    | 0.01    | 0.00    | 0.00    | 0.00    | 0.00     |
| P16157                | 1.00    | 1.00    | 0.99    | 0.75    | 0.29    | 0.12    | 0.08    | 0.05    | 0.03    | 0.00    | 0.00     |
| P20749                | 1.00    | 1.00    | 0.92    | 0.49    | 0.13    | 0.02    | 0.00    | 0.00    | 0.00    | 0.00    | 0.00     |
| P25963                | 1.00    | 1.00    | 0.84    | 0.32    | 0.16    | 0.09    | 0.04    | 0.00    | 0.00    | 0.00    | 0.00     |
| P42771                | 1.00    | 0.98    | 0.83    | 0.22    | 0.00    | 0.00    | 0.00    | 0.00    | 0.00    | 0.00    | 0.00     |
| P42773                | 1.00    | 0.98    | 0.77    | 0.07    | 0.00    | 0.00    | 0.00    | 0.00    | 0.00    | 0.00    | 0.00     |
| P46531                | 1.00    | 1.00    | 1.00    | 0.83    | 0.36    | 0.21    | 0.09    | 0.03    | 0.01    | 0.01    | 0.00     |
| P46683                | 1.00    | 1.00    | 0.80    | 0.07    | 0.04    | 0.00    | 0.00    | 0.00    | 0.00    | 0.00    | 0.00     |
| P50086                | 1.00    | 1.00    | 0.84    | 0.20    | 0.07    | 0.00    | 0.00    | 0.00    | 0.00    | 0.00    | 0.00     |
| P55271                | 1.00    | 0.98    | 0.71    | 0.16    | 0.00    | 0.00    | 0.00    | 0.00    | 0.00    | 0.00    | 0.00     |
| P55273                | 1.00    | 1.00    | 0.84    | 0.23    | 0.00    | 0.00    | 0.00    | 0.00    | 0.00    | 0.00    | 0.00     |
| P58546                | 1.00    | 0.99    | 0.49    | 0.15    | 0.07    | 0.00    | 0.00    | 0.00    | 0.00    | 0.00    | 0.00     |
| P62774                | 1.00    | 0.99    | 0.52    | 0.15    | 0.07    | 0.00    | 0.00    | 0.00    | 0.00    | 0.00    | 0.00     |
| P62775                | 1.00    | 0.99    | 0.52    | 0.15    | 0.07    | 0.00    | 0.00    | 0.00    | 0.00    | 0.00    | 0.00     |
| Q00420                | 1.00    | 1.00    | 0.89    | 0.29    | 0.06    | 0.00    | 0.00    | 0.00    | 0.00    | 0.00    | 0.00     |

|        |      |      |      |      |      |      |      |      |      |      |      |
|--------|------|------|------|------|------|------|------|------|------|------|------|
| Q01705 | 1.00 | 1.00 | 1.00 | 0.83 | 0.37 | 0.22 | 0.09 | 0.04 | 0.01 | 0.01 | 0.00 |
| Q05823 | 1.00 | 1.00 | 0.97 | 0.51 | 0.08 | 0.03 | 0.00 | 0.00 | 0.00 | 0.00 | 0.00 |
| Q13418 | 1.00 | 1.00 | 0.92 | 0.18 | 0.02 | 0.00 | 0.00 | 0.00 | 0.00 | 0.00 | 0.00 |
| Q13625 | 1.00 | 1.00 | 0.98 | 0.58 | 0.12 | 0.02 | 0.00 | 0.00 | 0.00 | 0.00 | 0.00 |
| Q15027 | 1.00 | 1.00 | 0.96 | 0.44 | 0.07 | 0.00 | 0.00 | 0.00 | 0.00 | 0.00 | 0.00 |
| Q5ZSV0 | 1.00 | 1.00 | 0.83 | 0.41 | 0.25 | 0.22 | 0.19 | 0.17 | 0.17 | 0.13 | 0.13 |
| Q5ZXN6 | 1.00 | 1.00 | 0.99 | 0.50 | 0.08 | 0.01 | 0.00 | 0.00 | 0.00 | 0.00 | 0.00 |
| Q60773 | 1.00 | 0.99 | 0.72 | 0.12 | 0.05 | 0.00 | 0.00 | 0.00 | 0.00 | 0.00 | 0.00 |
| Q60778 | 1.00 | 1.00 | 0.91 | 0.36 | 0.18 | 0.09 | 0.05 | 0.00 | 0.00 | 0.00 | 0.00 |
| Q63ZY3 | 1.00 | 1.00 | 0.97 | 0.52 | 0.09 | 0.03 | 0.02 | 0.02 | 0.00 | 0.00 | 0.00 |
| Q6IV60 | 1.00 | 1.00 | 0.84 | 0.23 | 0.03 | 0.00 | 0.00 | 0.00 | 0.00 | 0.00 | 0.00 |
| Q6PFX9 | 1.00 | 1.00 | 0.99 | 0.63 | 0.33 | 0.20 | 0.15 | 0.14 | 0.09 | 0.07 | 0.06 |
| Q7SIG6 | 1.00 | 1.00 | 0.98 | 0.50 | 0.07 | 0.02 | 0.00 | 0.00 | 0.00 | 0.00 | 0.00 |
| Q838Q8 | 1.00 | 1.00 | 0.83 | 0.32 | 0.04 | 0.00 | 0.00 | 0.00 | 0.00 | 0.00 | 0.00 |
| Q8IUH5 | 1.00 | 1.00 | 0.94 | 0.33 | 0.02 | 0.00 | 0.00 | 0.00 | 0.00 | 0.00 | 0.00 |
| Q8TDY4 | 1.00 | 1.00 | 0.97 | 0.48 | 0.04 | 0.00 | 0.00 | 0.00 | 0.00 | 0.00 | 0.00 |
| Q8WUF5 | 1.00 | 1.00 | 0.97 | 0.56 | 0.21 | 0.05 | 0.03 | 0.01 | 0.01 | 0.01 | 0.00 |
| Q90623 | 1.00 | 1.00 | 0.99 | 0.63 | 0.25 | 0.09 | 0.03 | 0.00 | 0.00 | 0.00 | 0.00 |
| Q91WD2 | 1.00 | 1.00 | 0.97 | 0.31 | 0.03 | 0.02 | 0.02 | 0.00 | 0.00 | 0.00 | 0.00 |
| Q92882 | 1.00 | 1.00 | 0.69 | 0.13 | 0.00 | 0.00 | 0.00 | 0.00 | 0.00 | 0.00 | 0.00 |
| Q96DX5 | 1.00 | 1.00 | 0.87 | 0.30 | 0.05 | 0.00 | 0.00 | 0.00 | 0.00 | 0.00 | 0.00 |
| Q96NW4 | 1.00 | 1.00 | 0.98 | 0.46 | 0.11 | 0.07 | 0.03 | 0.02 | 0.00 | 0.00 | 0.00 |
| Q978J0 | 1.00 | 0.99 | 0.85 | 0.27 | 0.04 | 0.00 | 0.00 | 0.00 | 0.00 | 0.00 | 0.00 |
| Q99728 | 1.00 | 1.00 | 0.97 | 0.36 | 0.06 | 0.03 | 0.00 | 0.00 | 0.00 | 0.00 | 0.00 |
| Q9DFS3 | 1.00 | 1.00 | 0.98 | 0.44 | 0.05 | 0.00 | 0.00 | 0.00 | 0.00 | 0.00 | 0.00 |
| Q9H2K2 | 1.00 | 1.00 | 0.99 | 0.60 | 0.32 | 0.24 | 0.22 | 0.18 | 0.16 | 0.11 | 0.08 |
| Q9H9B1 | 1.00 | 1.00 | 0.99 | 0.53 | 0.10 | 0.00 | 0.00 | 0.00 | 0.00 | 0.00 | 0.00 |
| Q9H9E1 | 1.00 | 1.00 | 0.86 | 0.19 | 0.11 | 0.03 | 0.00 | 0.00 | 0.00 | 0.00 | 0.00 |
| Q9HBA0 | 1.00 | 1.00 | 0.98 | 0.38 | 0.04 | 0.01 | 0.00 | 0.00 | 0.00 | 0.00 | 0.00 |
| Q9WUD2 | 1.00 | 1.00 | 0.97 | 0.43 | 0.07 | 0.00 | 0.00 | 0.00 | 0.00 | 0.00 | 0.00 |
| Q9Y5S1 | 1.00 | 1.00 | 0.96 | 0.43 | 0.07 | 0.00 | 0.00 | 0.00 | 0.00 | 0.00 | 0.00 |
| Q9Z2X2 | 1.00 | 1.00 | 0.77 | 0.19 | 0.03 | 0.00 | 0.00 | 0.00 | 0.00 | 0.00 | 0.00 |

**Table S2: Coverage of trial sequences of the  $DEH_t$  group.** The values for the  $coverage(s, \mathcal{M}(s, i))$  function for each sequence,  $s$ , name by the UniProt identifier was calculated for different minimum length of the maximal repeats (MR) from  $i = 0 \dots 10$ . Values rounded to two decimal places.

| Uniprot ID<br>( $s$ ) | $i = 0$ | $i = 1$ | $i = 2$ | $i = 3$ | $i = 4$ | $i = 5$ | $i = 6$ | $i = 7$ | $i = 8$ | $i = 9$ | $i = 10$ |
|-----------------------|---------|---------|---------|---------|---------|---------|---------|---------|---------|---------|----------|
| A5LNI9                | 1.00    | 1.00    | 0.84    | 0.23    | 0.07    | 0.04    | 0.00    | 0.00    | 0.00    | 0.00    | 0.00     |
| B0A4S9                | 1.00    | 0.99    | 0.78    | 0.17    | 0.00    | 0.00    | 0.00    | 0.00    | 0.00    | 0.00    | 0.00     |
| B2Z3V8                | 1.00    | 1.00    | 0.69    | 0.15    | 0.00    | 0.00    | 0.00    | 0.00    | 0.00    | 0.00    | 0.00     |
| B4A833                | 1.00    | 1.00    | 0.80    | 0.17    | 0.00    | 0.00    | 0.00    | 0.00    | 0.00    | 0.00    | 0.00     |
| B4ABS1                | 1.00    | 1.00    | 0.82    | 0.22    | 0.03    | 0.00    | 0.00    | 0.00    | 0.00    | 0.00    | 0.00     |
| C2JJ26                | 1.00    | 1.00    | 0.88    | 0.21    | 0.09    | 0.00    | 0.00    | 0.00    | 0.00    | 0.00    | 0.00     |
| C6IG92                | 1.00    | 0.99    | 0.56    | 0.00    | 0.00    | 0.00    | 0.00    | 0.00    | 0.00    | 0.00    | 0.00     |
| C7RF86                | 1.00    | 1.00    | 0.88    | 0.27    | 0.05    | 0.03    | 0.00    | 0.00    | 0.00    | 0.00    | 0.00     |
| D4FVT8                | 1.00    | 1.00    | 0.70    | 0.00    | 0.00    | 0.00    | 0.00    | 0.00    | 0.00    | 0.00    | 0.00     |
| D4V4M5                | 1.00    | 1.00    | 0.72    | 0.20    | 0.03    | 0.00    | 0.00    | 0.00    | 0.00    | 0.00    | 0.00     |
| D7IJ01                | 1.00    | 1.00    | 0.81    | 0.17    | 0.03    | 0.00    | 0.00    | 0.00    | 0.00    | 0.00    | 0.00     |
| D8FP15                | 1.00    | 1.00    | 0.78    | 0.12    | 0.00    | 0.00    | 0.00    | 0.00    | 0.00    | 0.00    | 0.00     |
| G9RLJ0                | 1.00    | 1.00    | 0.78    | 0.09    | 0.00    | 0.00    | 0.00    | 0.00    | 0.00    | 0.00    | 0.00     |
| K2T267                | 1.00    | 0.99    | 0.73    | 0.13    | 0.00    | 0.00    | 0.00    | 0.00    | 0.00    | 0.00    | 0.00     |
| M2DKS0                | 1.00    | 0.99    | 0.89    | 0.22    | 0.04    | 0.00    | 0.00    | 0.00    | 0.00    | 0.00    | 0.00     |
| M4SEQ9                | 1.00    | 1.00    | 0.96    | 0.48    | 0.05    | 0.00    | 0.00    | 0.00    | 0.00    | 0.00    | 0.00     |
| O08575                | 1.00    | 1.00    | 0.92    | 0.32    | 0.07    | 0.00    | 0.00    | 0.00    | 0.00    | 0.00    | 0.00     |
| O15305                | 1.00    | 1.00    | 0.76    | 0.20    | 0.03    | 0.00    | 0.00    | 0.00    | 0.00    | 0.00    | 0.00     |
| O29777                | 1.00    | 1.00    | 0.97    | 0.55    | 0.10    | 0.03    | 0.01    | 0.00    | 0.00    | 0.00    | 0.00     |
| O32125                | 1.00    | 1.00    | 0.80    | 0.09    | 0.02    | 0.02    | 0.00    | 0.00    | 0.00    | 0.00    | 0.00     |
| O32220                | 1.00    | 1.00    | 0.98    | 0.51    | 0.10    | 0.02    | 0.02    | 0.02    | 0.02    | 0.00    | 0.00     |
| O59346                | 1.00    | 1.00    | 0.79    | 0.12    | 0.00    | 0.00    | 0.00    | 0.00    | 0.00    | 0.00    | 0.00     |
| O67920                | 1.00    | 1.00    | 0.74    | 0.23    | 0.00    | 0.00    | 0.00    | 0.00    | 0.00    | 0.00    | 0.00     |
| P05023                | 1.00    | 1.00    | 0.97    | 0.30    | 0.08    | 0.01    | 0.00    | 0.00    | 0.00    | 0.00    | 0.00     |
| P06685                | 1.00    | 1.00    | 0.99    | 0.43    | 0.05    | 0.00    | 0.00    | 0.00    | 0.00    | 0.00    | 0.00     |
| P0AE22                | 1.00    | 1.00    | 0.73    | 0.13    | 0.00    | 0.00    | 0.00    | 0.00    | 0.00    | 0.00    | 0.00     |
| P20649                | 1.00    | 1.00    | 0.99    | 0.42    | 0.04    | 0.01    | 0.01    | 0.00    | 0.00    | 0.00    | 0.00     |
| P35670                | 1.00    | 0.99    | 0.72    | 0.04    | 0.00    | 0.00    | 0.00    | 0.00    | 0.00    | 0.00    | 0.00     |
| P78330                | 1.00    | 1.00    | 0.75    | 0.12    | 0.00    | 0.00    | 0.00    | 0.00    | 0.00    | 0.00    | 0.00     |
| P94592                | 1.00    | 1.00    | 0.83    | 0.08    | 0.00    | 0.00    | 0.00    | 0.00    | 0.00    | 0.00    | 0.00     |
| Q04656                | 1.00    | 0.97    | 0.52    | 0.13    | 0.07    | 0.07    | 0.00    | 0.00    | 0.00    | 0.00    | 0.00     |
| Q11S56                | 1.00    | 1.00    | 0.77    | 0.15    | 0.03    | 0.00    | 0.00    | 0.00    | 0.00    | 0.00    | 0.00     |
| Q2T109                | 1.00    | 0.99    | 0.68    | 0.02    | 0.00    | 0.00    | 0.00    | 0.00    | 0.00    | 0.00    | 0.00     |
| Q3UGR5                | 1.00    | 1.00    | 0.83    | 0.24    | 0.00    | 0.00    | 0.00    | 0.00    | 0.00    | 0.00    | 0.00     |
| Q5EBQ9                | 1.00    | 1.00    | 0.73    | 0.06    | 0.00    | 0.00    | 0.00    | 0.00    | 0.00    | 0.00    | 0.00     |
| Q5SJK3                | 1.00    | 0.99    | 0.91    | 0.40    | 0.18    | 0.04    | 0.00    | 0.00    | 0.00    | 0.00    | 0.00     |
| Q60048                | 1.00    | 1.00    | 0.97    | 0.45    | 0.02    | 0.00    | 0.00    | 0.00    | 0.00    | 0.00    | 0.00     |
| Q7ADF8                | 1.00    | 1.00    | 0.75    | 0.13    | 0.07    | 0.00    | 0.00    | 0.00    | 0.00    | 0.00    | 0.00     |
| Q7WVG29               | 1.00    | 1.00    | 0.63    | 0.23    | 0.00    | 0.00    | 0.00    | 0.00    | 0.00    | 0.00    | 0.00     |
| Q8K7R3                | 1.00    | 0.99    | 0.86    | 0.25    | 0.03    | 0.00    | 0.00    | 0.00    | 0.00    | 0.00    | 0.00     |
| Q8L1N9                | 1.00    | 0.99    | 0.75    | 0.25    | 0.03    | 0.00    | 0.00    | 0.00    | 0.00    | 0.00    | 0.00     |

|        |      |      |      |      |      |      |      |      |      |      |      |
|--------|------|------|------|------|------|------|------|------|------|------|------|
| Q8TBE9 | 1.00 | 1.00 | 0.81 | 0.13 | 0.05 | 0.02 | 0.00 | 0.00 | 0.00 | 0.00 | 0.00 |
| Q96X90 | 1.00 | 1.00 | 0.85 | 0.21 | 0.00 | 0.00 | 0.00 | 0.00 | 0.00 | 0.00 | 0.00 |
| Q96XE7 | 1.00 | 1.00 | 0.84 | 0.13 | 0.04 | 0.00 | 0.00 | 0.00 | 0.00 | 0.00 | 0.00 |
| Q98I56 | 1.00 | 1.00 | 0.76 | 0.18 | 0.04 | 0.00 | 0.00 | 0.00 | 0.00 | 0.00 | 0.00 |
| Q9D020 | 1.00 | 1.00 | 0.85 | 0.19 | 0.00 | 0.00 | 0.00 | 0.00 | 0.00 | 0.00 | 0.00 |
| Q9JLV6 | 1.00 | 1.00 | 0.93 | 0.33 | 0.02 | 0.00 | 0.00 | 0.00 | 0.00 | 0.00 | 0.00 |
| Q9X0Y1 | 1.00 | 1.00 | 0.86 | 0.25 | 0.13 | 0.05 | 0.00 | 0.00 | 0.00 | 0.00 | 0.00 |
| T0QBN5 | 1.00 | 1.00 | 0.79 | 0.16 | 0.03 | 0.00 | 0.00 | 0.00 | 0.00 | 0.00 | 0.00 |
| U8H1V1 | 1.00 | 1.00 | 0.73 | 0.15 | 0.00 | 0.00 | 0.00 | 0.00 | 0.00 | 0.00 | 0.00 |

**Table S3: Coverage of trial sequences of the  $WD_t$  group.** The values for the  $coverage(s, \mathcal{M}(s, i))$  function for each sequence,  $s$ , name by the UniProt identifier was calculated for different minimum length of the maximal repeats (MR) from  $i = 0 \dots 10$ . Values rounded to two decimal places.

| Uniprot ID<br>( $s$ ) | $i = 0$ | $i = 1$ | $i = 2$ | $i = 3$ | $i = 4$ | $i = 5$ | $i = 6$ | $i = 7$ | $i = 8$ | $i = 9$ | $i = 10$ |
|-----------------------|---------|---------|---------|---------|---------|---------|---------|---------|---------|---------|----------|
| A6ZU46                | 1.00    | 1.00    | 0.99    | 0.44    | 0.04    | 0.01    | 0.00    | 0.00    | 0.00    | 0.00    | 0.00     |
| O14727                | 1.00    | 1.00    | 0.99    | 0.52    | 0.09    | 0.03    | 0.00    | 0.00    | 0.00    | 0.00    | 0.00     |
| O24456                | 1.00    | 1.00    | 0.86    | 0.39    | 0.11    | 0.09    | 0.04    | 0.04    | 0.00    | 0.00    | 0.00     |
| O75530                | 1.00    | 1.00    | 0.90    | 0.10    | 0.00    | 0.00    | 0.00    | 0.00    | 0.00    | 0.00    | 0.00     |
| O76071                | 1.00    | 1.00    | 0.86    | 0.37    | 0.17    | 0.12    | 0.08    | 0.04    | 0.00    | 0.00    | 0.00     |
| O88879                | 1.00    | 1.00    | 0.99    | 0.53    | 0.10    | 0.01    | 0.00    | 0.00    | 0.00    | 0.00    | 0.00     |
| O89053                | 1.00    | 1.00    | 0.91    | 0.28    | 0.09    | 0.02    | 0.00    | 0.00    | 0.00    | 0.00    | 0.00     |
| P07834                | 1.00    | 1.00    | 0.97    | 0.50    | 0.15    | 0.04    | 0.02    | 0.00    | 0.00    | 0.00    | 0.00     |
| P16649                | 1.00    | 1.00    | 0.97    | 0.53    | 0.22    | 0.08    | 0.05    | 0.02    | 0.02    | 0.00    | 0.00     |
| P26449                | 1.00    | 1.00    | 0.87    | 0.17    | 0.02    | 0.00    | 0.00    | 0.00    | 0.00    | 0.00    | 0.00     |
| P36037                | 1.00    | 1.00    | 0.97    | 0.39    | 0.03    | 0.00    | 0.00    | 0.00    | 0.00    | 0.00    | 0.00     |
| P38011                | 1.00    | 1.00    | 0.80    | 0.40    | 0.14    | 0.03    | 0.00    | 0.00    | 0.00    | 0.00    | 0.00     |
| P38262                | 1.00    | 1.00    | 0.93    | 0.36    | 0.04    | 0.00    | 0.00    | 0.00    | 0.00    | 0.00    | 0.00     |
| P38968                | 1.00    | 1.00    | 0.99    | 0.61    | 0.18    | 0.06    | 0.03    | 0.01    | 0.00    | 0.00    | 0.00     |
| P40217                | 1.00    | 1.00    | 0.90    | 0.22    | 0.06    | 0.00    | 0.00    | 0.00    | 0.00    | 0.00    | 0.00     |
| P46680                | 1.00    | 1.00    | 0.95    | 0.36    | 0.07    | 0.00    | 0.00    | 0.00    | 0.00    | 0.00    | 0.00     |
| P53011                | 1.00    | 1.00    | 0.87    | 0.18    | 0.00    | 0.00    | 0.00    | 0.00    | 0.00    | 0.00    | 0.00     |
| P53196                | 1.00    | 1.00    | 0.87    | 0.17    | 0.04    | 0.00    | 0.00    | 0.00    | 0.00    | 0.00    | 0.00     |
| P54311                | 1.00    | 1.00    | 0.88    | 0.28    | 0.09    | 0.03    | 0.00    | 0.00    | 0.00    | 0.00    | 0.00     |
| P55735                | 1.00    | 1.00    | 0.85    | 0.26    | 0.13    | 0.00    | 0.00    | 0.00    | 0.00    | 0.00    | 0.00     |
| P61964                | 1.00    | 1.00    | 0.87    | 0.43    | 0.24    | 0.15    | 0.10    | 0.08    | 0.00    | 0.00    | 0.00     |
| P61965                | 1.00    | 1.00    | 0.87    | 0.43    | 0.24    | 0.15    | 0.10    | 0.08    | 0.00    | 0.00    | 0.00     |
| P62871                | 1.00    | 1.00    | 0.88    | 0.28    | 0.09    | 0.03    | 0.00    | 0.00    | 0.00    | 0.00    | 0.00     |
| P62881                | 1.00    | 1.00    | 0.88    | 0.30    | 0.02    | 0.00    | 0.00    | 0.00    | 0.00    | 0.00    | 0.00     |
| P63005                | 1.00    | 1.00    | 0.90    | 0.34    | 0.12    | 0.04    | 0.04    | 0.04    | 0.04    | 0.04    | 0.00     |
| P63244                | 1.00    | 1.00    | 0.87    | 0.31    | 0.09    | 0.04    | 0.04    | 0.00    | 0.00    | 0.00    | 0.00     |
| P78406                | 1.00    | 1.00    | 0.86    | 0.15    | 0.00    | 0.00    | 0.00    | 0.00    | 0.00    | 0.00    | 0.00     |
| P78774                | 1.00    | 1.00    | 0.92    | 0.23    | 0.06    | 0.00    | 0.00    | 0.00    | 0.00    | 0.00    | 0.00     |
| P78972                | 1.00    | 1.00    | 0.95    | 0.32    | 0.03    | 0.00    | 0.00    | 0.00    | 0.00    | 0.00    | 0.00     |
| Q02793                | 1.00    | 1.00    | 0.87    | 0.28    | 0.02    | 0.00    | 0.00    | 0.00    | 0.00    | 0.00    | 0.00     |
| Q03774                | 1.00    | 1.00    | 0.92    | 0.30    | 0.01    | 0.00    | 0.00    | 0.00    | 0.00    | 0.00    | 0.00     |
| Q04491                | 1.00    | 1.00    | 0.88    | 0.28    | 0.03    | 0.00    | 0.00    | 0.00    | 0.00    | 0.00    | 0.00     |
| Q04724                | 1.00    | 1.00    | 0.97    | 0.41    | 0.07    | 0.01    | 0.01    | 0.00    | 0.00    | 0.00    | 0.00     |
| Q05583                | 1.00    | 1.00    | 0.87    | 0.24    | 0.05    | 0.03    | 0.00    | 0.00    | 0.00    | 0.00    | 0.00     |
| Q09028                | 1.00    | 1.00    | 0.90    | 0.30    | 0.08    | 0.02    | 0.00    | 0.00    | 0.00    | 0.00    | 0.00     |
| Q11176                | 1.00    | 1.00    | 0.97    | 0.40    | 0.08    | 0.00    | 0.00    | 0.00    | 0.00    | 0.00    | 0.00     |
| Q13216                | 1.00    | 1.00    | 0.88    | 0.27    | 0.04    | 0.00    | 0.00    | 0.00    | 0.00    | 0.00    | 0.00     |
| Q16576                | 1.00    | 1.00    | 0.90    | 0.24    | 0.02    | 0.00    | 0.00    | 0.00    | 0.00    | 0.00    | 0.00     |
| Q24572                | 1.00    | 1.00    | 0.90    | 0.22    | 0.06    | 0.02    | 0.00    | 0.00    | 0.00    | 0.00    | 0.00     |
| Q24D42                | 1.00    | 1.00    | 0.86    | 0.12    | 0.03    | 0.03    | 0.00    | 0.00    | 0.00    | 0.00    | 0.00     |
| Q2YDS1                | 1.00    | 1.00    | 0.93    | 0.33    | 0.02    | 0.02    | 0.00    | 0.00    | 0.00    | 0.00    | 0.00     |

|        |      |      |      |      |      |      |      |      |      |      |      |
|--------|------|------|------|------|------|------|------|------|------|------|------|
| Q58CQ2 | 1.00 | 1.00 | 0.86 | 0.19 | 0.02 | 0.00 | 0.00 | 0.00 | 0.00 | 0.00 | 0.00 |
| Q6CN23 | 1.00 | 1.00 | 0.85 | 0.19 | 0.05 | 0.00 | 0.00 | 0.00 | 0.00 | 0.00 | 0.00 |
| Q8LNY6 | 1.00 | 1.00 | 0.87 | 0.29 | 0.00 | 0.00 | 0.00 | 0.00 | 0.00 | 0.00 | 0.00 |
| Q921E6 | 1.00 | 1.00 | 0.90 | 0.10 | 0.00 | 0.00 | 0.00 | 0.00 | 0.00 | 0.00 | 0.00 |
| Q92466 | 1.00 | 1.00 | 0.90 | 0.14 | 0.04 | 0.00 | 0.00 | 0.00 | 0.00 | 0.00 | 0.00 |
| Q969H0 | 1.00 | 1.00 | 0.95 | 0.49 | 0.14 | 0.09 | 0.00 | 0.00 | 0.00 | 0.00 | 0.00 |
| Q96MX6 | 1.00 | 1.00 | 0.85 | 0.19 | 0.02 | 0.00 | 0.00 | 0.00 | 0.00 | 0.00 | 0.00 |
| Q9GZS3 | 1.00 | 1.00 | 0.90 | 0.30 | 0.09 | 0.04 | 0.04 | 0.00 | 0.00 | 0.00 | 0.00 |
| Q9Y297 | 1.00 | 1.00 | 0.94 | 0.35 | 0.10 | 0.02 | 0.00 | 0.00 | 0.00 | 0.00 | 0.00 |



**Table S4: Values of *familiarity* function for several proteins and families.** Values of *familiarity*( $s, t$ ) function for  $s$  proteins from  $ANK_t$ ,  $DEH_t$ ,  $HET_t$  and  $WD_t$  test group dataset and  $t=s$ ,  $ANK_f$ ,  $DEH_f$ ,  $HET_f$  and  $WD_f$ .

| Uniprot ID<br>( $s$ ) | Test<br>Group | familiarity<br>( $s, s$ ) | familiarity<br>( $s, ANK_f$ ) | familiarity<br>( $s, DEH_f$ ) | familiarity<br>( $s, HET_f$ ) | familiarity<br>( $s, WD_f$ ) |
|-----------------------|---------------|---------------------------|-------------------------------|-------------------------------|-------------------------------|------------------------------|
| DARPIN-1D5            | $ANK_t$       | 5.06800                   | 9.32400                       | 6.14000                       | 6.42800                       | 6.48400                      |
| DARPIN-20             | $ANK_t$       | 4.47581                   | 9.30242                       | 6.18548                       | 6.48387                       | 6.28226                      |
| DARPIN-3ANK           | $ANK_t$       | 9.89560                   | 9.98901                       | 6.40110                       | 6.47802                       | 7.03846                      |
| DARPIN-3CA1A2N        | $ANK_t$       | 2.64773                   | 9.28977                       | 6.31818                       | 6.59091                       | 6.64773                      |
| DARPIN-3CA1A2N-OH     | $ANK_t$       | 2.89583                   | 8.96875                       | 6.32292                       | 6.63542                       | 6.75000                      |
| DARPIN-3H10           | $ANK_t$       | 6.14231                   | 9.46154                       | 6.15385                       | 6.50000                       | 6.53846                      |
| DARPIN-4ANK           | $ANK_t$       | 9.92460                   | 9.99603                       | 6.38889                       | 6.49206                       | 7.02381                      |
| DARPIN-AR-3A          | $ANK_t$       | 5.08065                   | 8.99677                       | 5.97097                       | 6.40323                       | 6.37097                      |
| DARPIN-AR-F8          | $ANK_t$       | 5.54747                   | 9.43354                       | 5.99367                       | 6.43671                       | 6.43038                      |
| DARPIN-E3-19          | $ANK_t$       | 6.10968                   | 9.10645                       | 5.96452                       | 6.49355                       | 6.54516                      |
| DARPIN-E3-5           | $ANK_t$       | 5.80503                   | 9.18868                       | 6.26730                       | 6.37421                       | 6.48742                      |
| DARPIN-H10-2-G3       | $ANK_t$       | 3.58871                   | 8.81855                       | 6.30645                       | 6.52419                       | 6.30645                      |
| DARPIN-NI1C-Mut4      | $ANK_t$       | 2.47826                   | 9.26630                       | 6.31522                       | 6.69565                       | 6.30435                      |
| DARPIN-NI3C           | $ANK_t$       | 7.50974                   | 9.70130                       | 6.35714                       | 6.71429                       | 6.44805                      |
| DARPIN-NI3C-Mut5      | $ANK_t$       | 7.43949                   | 9.28344                       | 6.44268                       | 6.69108                       | 6.43631                      |
| DARPIN-OFF7           | $ANK_t$       | 5.58599                   | 9.35350                       | 6.09873                       | 6.32166                       | 6.50000                      |
| E9ADW8                | $ANK_t$       | 2.71111                   | 8.22778                       | 6.06111                       | 6.20833                       | 5.99167                      |
| NRC                   | $ANK_t$       | 7.35652                   | 8.84783                       | 6.28261                       | 6.30870                       | 6.35217                      |
| O14593                | $ANK_t$       | 2.58462                   | 9.32115                       | 6.10385                       | 6.39231                       | 6.17692                      |
| O22265                | $ANK_t$       | 2.77614                   | 7.50268                       | 6.13539                       | 6.37936                       | 6.34182                      |
| O35433                | $ANK_t$       | 2.88425                   | 8.90811                       | 5.97494                       | 6.18496                       | 6.04177                      |
| O75832                | $ANK_t$       | 2.50885                   | 10.00000                      | 6.03540                       | 6.26549                       | 6.11504                      |
| OR264                 | $ANK_t$       | 7.62130                   | 9.04734                       | 6.37574                       | 6.54734                       | 6.48225                      |
| OR266                 | $ANK_t$       | 7.19527                   | 9.05621                       | 6.44083                       | 6.57101                       | 6.67160                      |
| P07207                | $ANK_t$       | 4.13559                   | 8.90400                       | 5.84388                       | 6.18054                       | 5.99815                      |
| P09959                | $ANK_t$       | 3.07659                   | 8.64757                       | 6.06663                       | 6.20112                       | 6.09153                      |
| P14585                | $ANK_t$       | 3.22638                   | 6.70644                       | 5.71344                       | 5.99265                       | 5.80861                      |
| P16157                | $ANK_t$       | 3.81366                   | 9.89234                       | 6.03854                       | 6.21983                       | 6.18155                      |
| P20749                | $ANK_t$       | 3.06388                   | 9.63326                       | 6.17401                       | 6.39207                       | 6.32819                      |
| P25963                | $ANK_t$       | 2.95110                   | 9.70347                       | 5.99842                       | 6.16246                       | 6.07729                      |
| P42771                | $ANK_t$       | 2.52564                   | 9.62179                       | 6.39744                       | 6.58974                       | 6.32051                      |
| P42773                | $ANK_t$       | 2.32143                   | 8.86905                       | 6.05357                       | 6.33929                       | 6.21429                      |
| P46531                | $ANK_t$       | 4.04090                   | 9.96732                       | 5.71996                       | 6.17319                       | 5.91957                      |
| P46683                | $ANK_t$       | 2.40500                   | 8.79250                       | 6.07500                       | 6.28000                       | 6.18000                      |
| P50086                | $ANK_t$       | 2.60965                   | 8.88158                       | 5.96053                       | 6.07456                       | 6.04386                      |
| P55271                | $ANK_t$       | 2.35385                   | 9.35769                       | 6.29231                       | 6.53846                       | 6.28462                      |
| P55273                | $ANK_t$       | 2.57229                   | 9.18072                       | 6.48193                       | 6.54217                       | 6.28916                      |
| P58546                | $ANK_t$       | 2.20339                   | 10.00000                      | 6.16949                       | 6.48305                       | 6.16949                      |
| P62774                | $ANK_t$       | 2.22881                   | 9.93220                       | 6.17797                       | 6.48305                       | 6.20339                      |
| P62775                | $ANK_t$       | 2.22881                   | 9.93220                       | 6.17797                       | 6.48305                       | 6.20339                      |
| Q00420                | $ANK_t$       | 2.73760                   | 9.70627                       | 6.10836                       | 6.30679                       | 6.19452                      |

|        |                  |         |         |         |         |         |
|--------|------------------|---------|---------|---------|---------|---------|
| Q01705 | ANK <sub>t</sub> | 4.07171 | 9.23983 | 5.70348 | 6.13177 | 5.89826 |
| Q05823 | ANK <sub>t</sub> | 3.10324 | 8.65992 | 6.07490 | 6.25978 | 6.07760 |
| Q13418 | ANK <sub>t</sub> | 2.62168 | 9.83739 | 5.95575 | 6.06637 | 5.98230 |
| Q13625 | ANK <sub>t</sub> | 3.19947 | 9.97562 | 6.00621 | 6.28989 | 6.09486 |
| Q15027 | ANK <sub>t</sub> | 2.97432 | 9.95946 | 6.05676 | 6.33514 | 6.17568 |
| Q5ZSV0 | ANK <sub>t</sub> | 3.94565 | 6.36957 | 6.06793 | 6.32337 | 6.00000 |
| Q5ZXN6 | ANK <sub>t</sub> | 3.08588 | 6.35195 | 6.02898 | 6.27028 | 6.04162 |
| Q60773 | ANK <sub>t</sub> | 2.37952 | 9.19578 | 6.36145 | 6.40964 | 6.33735 |
| Q60778 | ANK <sub>t</sub> | 3.09331 | 8.98607 | 6.24373 | 6.41365 | 6.23259 |
| Q63ZY3 | ANK <sub>t</sub> | 3.14160 | 9.40071 | 6.13690 | 6.36957 | 6.26028 |
| Q6IV60 | ANK <sub>t</sub> | 2.59507 | 6.33099 | 6.06338 | 6.16901 | 5.98944 |
| Q6PFX9 | ANK <sub>t</sub> | 4.12500 | 9.73977 | 6.24697 | 6.40379 | 6.25152 |
| Q7SIG6 | ANK <sub>t</sub> | 3.06994 | 9.56002 | 5.99791 | 6.19833 | 6.08768 |
| Q838Q8 | ANK <sub>t</sub> | 2.68905 | 8.29104 | 6.07711 | 6.26617 | 6.10199 |
| Q8IUH5 | ANK <sub>t</sub> | 2.78956 | 9.92880 | 5.83386 | 5.98892 | 5.85759 |
| Q8TDY4 | ANK <sub>t</sub> | 2.99612 | 9.72425 | 6.08250 | 6.23976 | 6.20321 |
| Q8WUF5 | ANK <sub>t</sub> | 3.36353 | 9.62077 | 6.18478 | 6.43720 | 6.28684 |
| Q90623 | ANK <sub>t</sub> | 3.49203 | 9.92281 | 6.23207 | 6.47809 | 6.36952 |
| Q91WD2 | ANK <sub>t</sub> | 2.83700 | 9.29780 | 5.99381 | 6.21527 | 5.99794 |
| Q92882 | ANK <sub>t</sub> | 2.32243 | 9.98832 | 6.14953 | 6.22897 | 6.00000 |
| Q96DX5 | ANK <sub>t</sub> | 2.72109 | 9.28231 | 5.88435 | 6.14286 | 6.08844 |
| Q96NW4 | ANK <sub>t</sub> | 3.17714 | 9.90714 | 5.95238 | 6.15619 | 6.07524 |
| Q978J0 | ANK <sub>t</sub> | 2.64815 | 7.31481 | 6.16138 | 6.26720 | 6.08201 |
| Q99728 | ANK <sub>t</sub> | 2.90669 | 9.97748 | 6.01609 | 6.12806 | 6.09974 |
| Q9DFS3 | ANK <sub>t</sub> | 2.96596 | 9.47946 | 6.05282 | 6.19131 | 6.04695 |
| Q9H2K2 | ANK <sub>t</sub> | 4.34991 | 9.93568 | 6.13036 | 6.25300 | 6.13979 |
| Q9H9B1 | ANK <sub>t</sub> | 3.11864 | 9.67989 | 6.01618 | 6.16949 | 6.10015 |
| Q9H9E1 | ANK <sub>t</sub> | 2.69169 | 9.53514 | 5.89936 | 6.18690 | 6.15815 |
| Q9HBA0 | ANK <sub>t</sub> | 2.91102 | 9.75488 | 6.01665 | 6.15557 | 5.99254 |
| Q9WUD2 | ANK <sub>t</sub> | 2.97175 | 8.33903 | 5.99409 | 6.18331 | 6.01511 |
| Q9Y5S1 | ANK <sub>t</sub> | 2.95812 | 9.48429 | 6.00785 | 6.21335 | 6.00524 |
| Q9Z2X2 | ANK <sub>t</sub> | 2.49567 | 9.54545 | 6.08442 | 6.24026 | 6.14069 |
|        |                  |         |         |         |         |         |
| A5LNI9 | DEH <sub>t</sub> | 2.67899 | 6.07198 | 9.86965 | 6.28988 | 6.11089 |
| B0A4S9 | DEH <sub>t</sub> | 2.43678 | 6.06322 | 9.90230 | 6.39080 | 5.97126 |
| B2Z3V8 | DEH <sub>t</sub> | 2.33750 | 6.00833 | 7.10417 | 6.03333 | 5.96667 |
| B4A833 | DEH <sub>t</sub> | 2.46610 | 6.00847 | 8.16949 | 6.23898 | 5.99492 |
| B4ABS1 | DEH <sub>t</sub> | 2.56400 | 5.93200 | 9.93400 | 6.20400 | 6.08000 |
| C2JJ26 | DEH <sub>t</sub> | 2.68750 | 6.14062 | 9.41211 | 6.31250 | 6.08984 |
| C6IG92 | DEH <sub>t</sub> | 2.05396 | 6.03957 | 7.30216 | 6.17626 | 6.03237 |
| C7RF86 | DEH <sub>t</sub> | 2.73298 | 5.88482 | 6.77880 | 6.31152 | 5.89005 |
| D4FVT8 | DEH <sub>t</sub> | 2.19787 | 5.91702 | 8.12340 | 6.09149 | 6.01489 |
| D4V4M5 | DEH <sub>t</sub> | 2.45082 | 5.96311 | 8.51639 | 6.30738 | 5.99180 |
| D7IJ01 | DEH <sub>t</sub> | 2.50388 | 5.96512 | 8.57171 | 6.43023 | 6.02713 |
| D8FP15 | DEH <sub>t</sub> | 2.39121 | 6.12343 | 7.89958 | 6.35774 | 6.15690 |
| G9RLJ0 | DEH <sub>t</sub> | 2.37218 | 5.92105 | 9.28947 | 6.16917 | 5.92857 |
| K2T267 | DEH <sub>t</sub> | 2.35475 | 6.03631 | 9.81006 | 6.46089 | 6.18715 |

|        |                  |         |         |          |         |         |
|--------|------------------|---------|---------|----------|---------|---------|
| M2DKS0 | DEH <sub>t</sub> | 2.64786 | 6.04864 | 9.79183  | 6.32101 | 6.13035 |
| M4SEQ9 | DEH <sub>t</sub> | 2.99457 | 6.08288 | 9.59986  | 6.66372 | 6.18478 |
| O08575 | DEH <sub>t</sub> | 2.80263 | 6.07143 | 10.00000 | 6.16917 | 6.06203 |
| O15305 | DEH <sub>t</sub> | 2.49187 | 5.91463 | 9.67683  | 6.17886 | 5.92276 |
| O29777 | DEH <sub>t</sub> | 3.16667 | 6.24627 | 8.13744  | 6.64677 | 6.26368 |
| O32125 | DEH <sub>t</sub> | 2.42857 | 5.92481 | 9.30639  | 6.14662 | 6.10150 |
| O32220 | DEH <sub>t</sub> | 3.18080 | 6.12095 | 9.91459  | 6.71945 | 6.19202 |
| O59346 | DEH <sub>t</sub> | 2.41286 | 6.06017 | 8.80498  | 6.28423 | 5.93983 |
| O67920 | DEH <sub>t</sub> | 2.47546 | 6.24847 | 7.08896  | 6.57975 | 6.23006 |
| P05023 | DEH <sub>t</sub> | 2.87004 | 6.06241 | 9.73642  | 6.50294 | 6.07269 |
| P06685 | DEH <sub>t</sub> | 2.97801 | 6.01222 | 9.84702  | 6.49316 | 6.02590 |
| P0AE22 | DEH <sub>t</sub> | 2.35232 | 6.01477 | 10.00000 | 6.19620 | 6.13291 |
| P20649 | DEH <sub>t</sub> | 2.97102 | 6.03635 | 9.51791  | 6.55901 | 6.04162 |
| P35670 | DEH <sub>t</sub> | 2.25177 | 6.08865 | 9.69858  | 6.42199 | 6.34397 |
| P78330 | DEH <sub>t</sub> | 2.35778 | 6.05111 | 10.00000 | 6.26444 | 6.11333 |
| P94592 | DEH <sub>t</sub> | 2.41579 | 6.04737 | 9.47719  | 6.26491 | 6.09298 |
| Q04656 | DEH <sub>t</sub> | 2.25556 | 6.38889 | 8.45000  | 6.77778 | 6.34444 |
| Q11S56 | DEH <sub>t</sub> | 2.43993 | 5.95230 | 7.00000  | 6.20318 | 6.05124 |
| Q2T109 | DEH <sub>t</sub> | 2.18984 | 6.21658 | 9.75134  | 6.51070 | 6.16845 |
| Q3UGR5 | DEH <sub>t</sub> | 2.57469 | 6.20954 | 9.46888  | 6.42531 | 6.11411 |
| Q5EBQ9 | DEH <sub>t</sub> | 2.28302 | 5.97642 | 9.93868  | 6.08019 | 5.94811 |
| Q5SJQ3 | DEH <sub>t</sub> | 3.01737 | 6.43436 | 7.05019  | 6.71622 | 6.39961 |
| Q60048 | DEH <sub>t</sub> | 2.94304 | 6.07243 | 8.48101  | 6.42827 | 6.10197 |
| Q7ADF8 | DEH <sub>t</sub> | 2.45045 | 6.12613 | 9.80856  | 6.46396 | 6.20721 |
| Q7WG29 | DEH <sub>t</sub> | 2.36034 | 6.05307 | 8.79609  | 6.31006 | 6.11453 |
| Q8K7R3 | DEH <sub>t</sub> | 2.62992 | 6.00787 | 9.36024  | 6.29921 | 6.06693 |
| Q8L1N9 | DEH <sub>t</sub> | 2.51961 | 6.01373 | 7.91765  | 6.31569 | 6.14706 |
| Q8TBE9 | DEH <sub>t</sub> | 2.51481 | 6.11111 | 9.65370  | 6.25185 | 6.12593 |
| Q96X90 | DEH <sub>t</sub> | 2.56364 | 6.05909 | 6.52727  | 6.37727 | 6.10455 |
| Q96XE7 | DEH <sub>t</sub> | 2.50971 | 6.09223 | 6.55340  | 6.08738 | 5.93204 |
| Q98I56 | DEH <sub>t</sub> | 2.46774 | 6.07604 | 8.17281  | 6.43548 | 6.14055 |
| Q9D020 | DEH <sub>t</sub> | 2.54230 | 5.97734 | 9.47281  | 7.97432 | 6.00151 |
| Q9JLV6 | DEH <sub>t</sub> | 2.77969 | 6.06897 | 9.44636  | 6.25287 | 6.12069 |
| Q9X0Y1 | DEH <sub>t</sub> | 2.78704 | 6.22222 | 7.67130  | 6.50926 | 6.30093 |
| T0QBN5 | DEH <sub>t</sub> | 2.48062 | 5.98450 | 9.30620  | 6.43411 | 5.96124 |
| U8H1V1 | DEH <sub>t</sub> | 2.38293 | 6.01220 | 9.70976  | 6.24634 | 6.13415 |
|        |                  |         |         |          |         |         |
| B1MJ53 | HET <sub>t</sub> | 2.57143 | 6.10065 | 6.17208  | 6.47403 | 6.10714 |
| D3H0F7 | HET <sub>t</sub> | 2.73485 | 6.08333 | 6.15909  | 6.31061 | 5.97980 |
| E6Z0R3 | HET <sub>t</sub> | 2.85146 | 6.10460 | 6.02092  | 6.21757 | 6.03975 |
| F4AR88 | HET <sub>t</sub> | 2.58306 | 6.07475 | 6.04485  | 6.99834 | 6.10465 |
| O06961 | HET <sub>t</sub> | 2.72886 | 6.04229 | 6.11443  | 6.96891 | 6.08706 |
| O52806 | HET <sub>t</sub> | 2.34878 | 5.94390 | 6.11951  | 6.38780 | 6.02195 |
| O58456 | HET <sub>t</sub> | 2.51887 | 6.06604 | 6.15283  | 6.25849 | 6.05849 |
| P00437 | HET <sub>t</sub> | 2.26569 | 5.75523 | 5.78033  | 6.11925 | 5.92259 |
| P00693 | HET <sub>t</sub> | 2.74658 | 5.96575 | 6.02740  | 6.31050 | 6.05251 |
| P00772 | HET <sub>t</sub> | 2.46617 | 5.90977 | 5.97368  | 6.18797 | 5.92857 |

|        |                  |         |         |         |         |          |
|--------|------------------|---------|---------|---------|---------|----------|
| P00800 | HET <sub>t</sub> | 2.79197 | 6.03102 | 5.95803 | 6.21350 | 6.08942  |
| P00918 | HET <sub>t</sub> | 2.41154 | 5.90385 | 5.90000 | 6.09231 | 5.95385  |
| P02883 | HET <sub>t</sub> | 2.25362 | 5.79952 | 5.80435 | 5.99758 | 5.82367  |
| P09211 | HET <sub>t</sub> | 2.49524 | 6.04762 | 5.99048 | 6.29524 | 5.99524  |
| P0A6C8 | HET <sub>t</sub> | 2.61628 | 6.13953 | 6.34884 | 6.70543 | 6.24031  |
| P0A8M3 | HET <sub>t</sub> | 2.70093 | 5.91433 | 5.90343 | 6.38941 | 5.81464  |
| P0C0Y9 | HET <sub>t</sub> | 2.53571 | 5.92857 | 5.94481 | 7.42695 | 6.08442  |
| P0C512 | HET <sub>t</sub> | 2.67610 | 5.90252 | 6.02201 | 6.89203 | 6.02411  |
| P23472 | HET <sub>t</sub> | 2.58360 | 6.08842 | 6.00804 | 6.21383 | 5.98553  |
| P23904 | HET <sub>t</sub> | 2.32700 | 5.79958 | 5.82489 | 6.00633 | 5.91772  |
| P26663 | HET <sub>t</sub> | 3.44219 | 6.05947 | 6.01561 | 6.59319 | 6.04485  |
| P27448 | HET <sub>t</sub> | 3.01394 | 6.10823 | 6.00598 | 6.63347 | 6.14542  |
| P29476 | HET <sub>t</sub> | 3.05353 | 5.96326 | 5.90308 | 6.22848 | 5.95136  |
| P32169 | HET <sub>t</sub> | 2.43431 | 5.99270 | 5.85036 | 6.22993 | 5.95255  |
| P35202 | HET <sub>t</sub> | 2.46865 | 6.00157 | 5.98903 | 6.16771 | 5.91066  |
| P37352 | HET <sub>t</sub> | 2.85831 | 5.94965 | 6.16745 | 6.28454 | 6.04801  |
| P46154 | HET <sub>t</sub> | 2.68296 | 6.08647 | 6.08897 | 6.63283 | 6.08647  |
| P50586 | HET <sub>t</sub> | 2.77129 | 6.21485 | 6.08614 | 6.33168 | 6.20693  |
| P61086 | HET <sub>t</sub> | 2.24500 | 6.20000 | 6.16500 | 6.64000 | 6.08500  |
| P69834 | HET <sub>t</sub> | 2.49338 | 6.05960 | 6.12914 | 6.32781 | 6.16225  |
| Q26997 | HET <sub>t</sub> | 2.51304 | 5.89130 | 5.88696 | 6.22174 | 5.94783  |
| Q3IWB0 | HET <sub>t</sub> | 3.08891 | 6.22658 | 6.27820 | 6.52868 | 6.30497  |
| Q51723 | HET <sub>t</sub> | 2.68644 | 5.95127 | 5.97669 | 6.25424 | 5.85169  |
| Q54727 | HET <sub>t</sub> | 2.93615 | 6.02941 | 6.01793 | 6.13989 | 6.02941  |
| Q5TA50 | HET <sub>t</sub> | 2.29907 | 6.09346 | 6.14486 | 6.24299 | 6.14953  |
| Q5TLG6 | HET <sub>t</sub> | 2.25446 | 5.73661 | 5.77232 | 5.96875 | 5.80804  |
| Q6DLV0 | HET <sub>t</sub> | 3.47434 | 5.90531 | 5.95752 | 6.16195 | 5.99115  |
| Q6G441 | HET <sub>t</sub> | 2.62381 | 6.09762 | 6.15476 | 6.74643 | 6.15952  |
| Q70C53 | HET <sub>t</sub> | 2.64793 | 5.96746 | 5.87574 | 6.03846 | 5.84911  |
| Q873X9 | HET <sub>t</sub> | 2.76790 | 6.02194 | 5.94342 | 6.26443 | 6.19515  |
| Q8A7T5 | HET <sub>t</sub> | 2.70487 | 6.11460 | 5.97465 | 6.43306 | 6.00913  |
| Q8DCF5 | HET <sub>t</sub> | 2.55389 | 5.96108 | 6.00000 | 6.64222 | 5.97605  |
| Q8TX37 | HET <sub>t</sub> | 2.88268 | 6.20950 | 6.29050 | 6.39385 | 6.20950  |
| Q97DM1 | HET <sub>t</sub> | 2.62946 | 5.80394 | 5.71951 | 5.98218 | 5.93715  |
| Q97VM5 | HET <sub>t</sub> | 2.67969 | 6.13542 | 6.20573 | 6.38021 | 6.20573  |
| Q9IFX1 | HET <sub>t</sub> | 2.94501 | 5.97826 | 5.91304 | 6.19309 | 6.06522  |
| Q9KFI6 | HET <sub>t</sub> | 2.55152 | 5.94028 | 6.01288 | 6.09719 | 5.90984  |
| Q9NUI1 | HET <sub>t</sub> | 2.67123 | 6.16438 | 6.04795 | 6.70548 | 6.30137  |
| Q9P286 | HET <sub>t</sub> | 2.90334 | 6.15299 | 5.93115 | 6.34562 | 6.12309  |
| Q9WZY5 | HET <sub>t</sub> | 2.49187 | 5.91463 | 5.89837 | 6.28862 | 5.95122  |
|        |                  |         |         |         |         |          |
| A6ZU46 | WD <sub>t</sub>  | 2.98594 | 6.11305 | 5.99606 | 6.26940 | 8.46794  |
| O14727 | WD <sub>t</sub>  | 3.13301 | 6.02484 | 5.91747 | 6.11538 | 9.78726  |
| O24456 | WD <sub>t</sub>  | 3.03211 | 6.05046 | 6.07798 | 6.16972 | 8.90214  |
| O75530 | WD <sub>t</sub>  | 2.50227 | 5.93991 | 6.26417 | 6.09637 | 10.00000 |
| O76071 | WD <sub>t</sub>  | 3.14012 | 6.02212 | 5.83333 | 6.09587 | 9.85103  |
| O88879 | WD <sub>t</sub>  | 3.12770 | 6.10689 | 5.94756 | 6.16293 | 8.70536  |

|        |                 |         |         |         |         |          |
|--------|-----------------|---------|---------|---------|---------|----------|
| O89053 | WD <sub>t</sub> | 2.79501 | 6.11605 | 5.97722 | 6.16377 | 9.34924  |
| P07834 | WD <sub>t</sub> | 3.17522 | 6.12901 | 6.09692 | 6.24968 | 7.62901  |
| P16649 | WD <sub>t</sub> | 3.38079 | 6.48177 | 6.21108 | 6.46143 | 8.45863  |
| P26449 | WD <sub>t</sub> | 2.56452 | 5.97214 | 5.94575 | 6.09531 | 6.52346  |
| P36037 | WD <sub>t</sub> | 2.89441 | 6.07343 | 6.02587 | 6.17552 | 7.58462  |
| P38011 | WD <sub>t</sub> | 2.86991 | 6.07680 | 5.89498 | 6.20846 | 9.03762  |
| P38262 | WD <sub>t</sub> | 2.84019 | 6.05701 | 6.02523 | 6.24206 | 7.56168  |
| P38968 | WD <sub>t</sub> | 3.37510 | 6.17557 | 5.97840 | 6.25805 | 7.30361  |
| P40217 | WD <sub>t</sub> | 2.67867 | 5.94092 | 5.76513 | 6.11960 | 9.54755  |
| P46680 | WD <sub>t</sub> | 2.88049 | 6.03333 | 5.96016 | 6.10000 | 8.23902  |
| P53011 | WD <sub>t</sub> | 2.55444 | 6.05587 | 5.85530 | 6.04728 | 9.23352  |
| P53196 | WD <sub>t</sub> | 2.57434 | 5.95564 | 5.95803 | 6.21223 | 6.55276  |
| P54311 | WD <sub>t</sub> | 2.77647 | 6.04412 | 5.86765 | 6.13824 | 9.99118  |
| P55735 | WD <sub>t</sub> | 2.75155 | 5.87888 | 5.80435 | 5.98137 | 9.64752  |
| P61964 | WD <sub>t</sub> | 3.37425 | 6.12874 | 5.96407 | 6.09880 | 10.00000 |
| P61965 | WD <sub>t</sub> | 3.37425 | 6.12874 | 5.96407 | 6.09880 | 10.00000 |
| P62871 | WD <sub>t</sub> | 2.77647 | 6.04412 | 5.86765 | 6.13824 | 9.99118  |
| P62881 | WD <sub>t</sub> | 2.69747 | 5.94051 | 5.87722 | 6.14304 | 9.78101  |
| P63005 | WD <sub>t</sub> | 3.07561 | 5.94634 | 5.90732 | 6.04146 | 10.00000 |
| P63244 | WD <sub>t</sub> | 2.84700 | 5.95741 | 5.85331 | 6.08044 | 10.00000 |
| P78406 | WD <sub>t</sub> | 2.50272 | 5.80978 | 5.72283 | 5.97826 | 10.00000 |
| P78774 | WD <sub>t</sub> | 2.69629 | 6.03581 | 5.95093 | 6.10212 | 7.21618  |
| P78972 | WD <sub>t</sub> | 2.80533 | 6.04508 | 5.89959 | 6.17828 | 7.40779  |
| Q02793 | WD <sub>t</sub> | 2.66877 | 5.99874 | 5.93073 | 6.17758 | 6.61083  |
| Q03774 | WD <sub>t</sub> | 2.73198 | 5.99550 | 5.95045 | 6.06532 | 7.38063  |
| Q04491 | WD <sub>t</sub> | 2.67845 | 5.90404 | 5.91751 | 6.07912 | 9.54377  |
| Q04724 | WD <sub>t</sub> | 2.96234 | 6.08701 | 5.96883 | 6.22208 | 9.81234  |
| Q05583 | WD <sub>t</sub> | 2.69697 | 6.12121 | 5.91212 | 6.21515 | 7.93485  |
| Q09028 | WD <sub>t</sub> | 2.80118 | 6.05529 | 5.99176 | 6.02706 | 10.00000 |
| Q11176 | WD <sub>t</sub> | 2.95172 | 5.99264 | 5.91899 | 6.10720 | 8.57774  |
| Q13216 | WD <sub>t</sub> | 2.69192 | 5.92424 | 5.91919 | 6.04798 | 9.47727  |
| Q16576 | WD <sub>t</sub> | 2.65059 | 6.03176 | 5.99882 | 6.01294 | 9.94588  |
| Q24572 | WD <sub>t</sub> | 2.70000 | 6.00698 | 5.97674 | 6.01628 | 9.47442  |
| Q24D42 | WD <sub>t</sub> | 2.53499 | 5.83236 | 5.81195 | 6.04519 | 8.56997  |
| Q2YDS1 | WD <sub>t</sub> | 2.79839 | 6.01815 | 5.92540 | 6.19153 | 7.14516  |
| Q58CQ2 | WD <sub>t</sub> | 2.57527 | 6.00000 | 5.92742 | 6.08333 | 9.57661  |
| Q6CN23 | WD <sub>t</sub> | 2.57965 | 5.81858 | 5.89528 | 5.98083 | 6.29941  |
| Q8LNY6 | WD <sub>t</sub> | 2.65526 | 5.93158 | 5.90000 | 6.01053 | 7.78684  |
| Q921E6 | WD <sub>t</sub> | 2.50227 | 5.93991 | 6.26417 | 6.09637 | 10.00000 |
| Q92466 | WD <sub>t</sub> | 2.57260 | 5.97541 | 5.91920 | 6.08782 | 8.87822  |
| Q969H0 | WD <sub>t</sub> | 3.17751 | 6.16478 | 6.01061 | 6.25106 | 9.48798  |
| Q96MX6 | WD <sub>t</sub> | 2.56162 | 6.01541 | 5.81933 | 6.03782 | 9.86695  |
| Q9GZS3 | WD <sub>t</sub> | 2.86721 | 5.95246 | 6.02131 | 6.19180 | 9.97049  |
| Q9Y297 | WD <sub>t</sub> | 2.90992 | 6.00744 | 5.93306 | 6.07190 | 10.00000 |

**Table S5: Additional datasets.** Dataset description for several protein families used in this work.

| Family Name     | Type     | Total number of residues | Pfam ID |
|-----------------|----------|--------------------------|---------|
| ABC_tran        | Globular | 24,000,412               | PF00005 |
| Ank             | Repeat   | 24,000,002               | PF00023 |
| Annexin         | Repeat   | 1,327,710                | PF00191 |
| Arm             | Repeat   | 14,246,437               | PF00514 |
| Collagen        | Repeat   | 6,213,389                | PF01391 |
| CorA            | Globular | 5,855,946                | PF01544 |
| CW_binding_1    | Repeat   | 3,070,696                | PF01473 |
| Fer4            | Repeat   | 13,342,438               | PF00037 |
| Filamin         | Repeat   | 5,278,919                | PF00630 |
| GDC-P           | Globular | 4,904,935                | PF02347 |
| Globin          | Globular | 2,013,817                | PF00042 |
| Glyco_hydro_19  | Globular | 1,099,396                | PF00182 |
| GreA_GreB       | Globular | 1,561,778                | PF01272 |
| HEAT            | Repeat   | 24,000,562               | PF02985 |
| Helicase_C      | Globular | 24,001,596               | PF00271 |
| HemolysinCabind | Repeat   | 12,189,037               | PF00353 |
| Hexapep         | Repeat   | 10,993,336               | PF00132 |
| Kelch_1         | Repeat   | 7,901,965                | PF01344 |
| Ldl_recept_a    | Repeat   | 13,481,548               | PF00057 |
| Ldl_recept_b    | Repeat   | 5,706,663                | PF00058 |
| LRR_1           | Repeat   | 24,000,048               | PF00560 |
| MgtE            | Globular | 2,304,763                | PF01769 |
| MIP             | Globular | 3,232,513                | PF00230 |
| Mito_carr       | Repeat   | 9,276,723                | PF00153 |
| MORN            | Repeat   | 4,254,637                | PF02493 |
| Nebulin         | Repeat   | 1,765,482                | PF00880 |
| PBP             | Globular | 1,475,270                | PF01161 |
| PD40            | Repeat   | 22,286,434               | PF07676 |
| Pentapeptide    | Repeat   | 5,625,441                | PF00805 |
| Peptidase_C25   | Globular | 1,260,515                | PF01364 |
| PFL-like        | Globular | 1,952,299                | PF02901 |
| PIN             | Globular | 3,151,435                | PF01850 |
| Pkinase         | Globular | 24,000,261               | PF00069 |
| PP-binding      | Globular | 24,000,381               | PF00550 |
| PPR             | Repeat   | 24,000,333               | PF01535 |
| PUD             | Globular | 1,173,193                | PF03714 |
| PUF             | Repeat   | 2,956,344                | PF00806 |
| Rhomboid        | Globular | 4,786,260                | PF01694 |
| Sel1            | Repeat   | 9,677,695                | PF08238 |
| TerB            | Globular | 1,674,918                | PF05099 |
| Thaumatin       | Globular | 828,946                  | PF00314 |
| TPR_1           | Repeat   | 24,000,070               | PF00515 |
| TSP_1           | Repeat   | 11,488,042               | PF00090 |
| Val_tRNA-synt_C | Globular | 4,098,556                | PF10458 |

|           |        |            |         |
|-----------|--------|------------|---------|
| WD40      | Repeat | 24,000,119 | PF00400 |
| YadA_head | Repeat | 4,451,109  | PF05658 |
